# Supplementary material
Source: HighWire-hosted journal article supplement (https://erj.ersjournals.com/content/56/1/2001634)
Supplement: inline-supplementary-material-1 [file inline-supplementary-material-1.pdf]

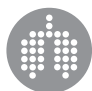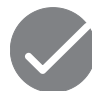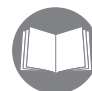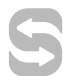

SHAREABLE PDF

# Endothelial cell dysfunction: a major player in SARS-CoV-2 infection (COVID-19)?

Alice Huertas <sup>1,2,3</sup>, David Montani <sup>1,2,3</sup>, Laurent Savale <sup>1,2,3</sup>,  
Jérémie Pichon<sup>1,2,3</sup>, Ly Tu <sup>1,2</sup>, Florence Parent<sup>1,2,3</sup>, Christophe Guignabert <sup>1,2</sup>  
and Marc Humbert <sup>1,2,3</sup>

**Affiliations:** <sup>1</sup>Université Paris-Saclay, School of Medicine, Le Kremlin-Bicêtre, France. <sup>2</sup>INSERM UMR\_S 999 «Pulmonary Hypertension: Pathophysiology and Novel Therapies», Hôpital Marie Lannelongue, Le Plessis-Robinson, France. <sup>3</sup>Assistance Publique - Hôpitaux de Paris (AP-HP), Department of Respiratory and Intensive Care Medicine, Pulmonary Hypertension National Referral Center, Hôpital Bicêtre, Le Kremlin-Bicêtre, France.

**Correspondence:** Alice Huertas, INSERM UMR\_S 999, Hôpital Marie Lannelongue 133, Avenue de la Résistance 92350, Le Plessis-Robinson, France. E-mail: [alice.huertas@inserm.fr](mailto:alice.huertas@inserm.fr)

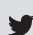

@ERSpublications

**Endothelial cell dysfunction and impaired microcirculatory function contribute markedly to life-threatening complications of COVID-19, such as venous thromboembolic disease and multiple organ involvement** <https://bit.ly/3cZMjKV>

**Cite this article as:** Huertas A, Montani D, Savale L, *et al.* Endothelial cell dysfunction: a major player in SARS-CoV-2 infection (COVID-19)? *Eur Respir J* 2020; 56: 2001634 [<https://doi.org/10.1183/13993003.01634-2020>].

This single-page version can be shared freely online.

Coronavirus disease 2019 (COVID-19) represents a public health crisis of pandemic proportions. Caused by the severe acute respiratory syndrome coronavirus 2 (SARS-CoV-2), the symptoms most commonly reported include cough, fever and shortness of breath, but extra-pulmonary symptoms may also be present, such as neurological and gastroenterological manifestations.
